# Supplementary material
Source: Springer Nature journal article supplement (https://www.springermedizin.de/resource/supplementary/12943_2013_1287_MOESM2_ESM.pdf/9553156)

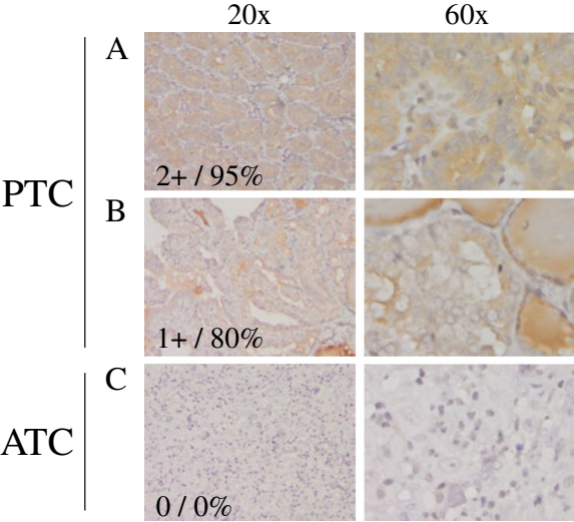

Supplement: MOESM2 [file 9553156]
